# Supplementary material for: Social deprivation independently impacts clinical outcomes in patients with chronic lymphocytic leukemia
Source: PubMed Central journal article supplement — Haematologica. 2024 Jan 25;109(5):1566–9. doi: 10.3324/haematol.2023.283527 (PMC11063865; doi:10.3324/haematol.2023.283527), 2024-01-25
Supplement: 2023_283527_FEGAN_SUPPL.pdf [file 2023_283527_FEGAN_SUPPL.pdf]

# Social deprivation independently impacts clinical outcomes in patients with chronic lymphocytic leukemia

## Authors

---

Gregory Fegan,<sup>1</sup> Daniel Tod,<sup>1</sup> Abigail Downing,<sup>2</sup> Nagah Elmusharaf,<sup>2</sup> Christopher Pepper<sup>3</sup> and Christopher Fegan<sup>4</sup>

<sup>1</sup>Swansea Trial Unit, Swansea University Medical School, Singleton Park, Swansea; <sup>2</sup>Department of Hematology, University Hospital of Wales, Heath Park, Cardiff; <sup>3</sup>Brighton and Sussex Medical School, University of Sussex, Brighton and <sup>4</sup>Institute of Cancer and Genetics, School of Medicine, Cardiff University, Heath Park, Cardiff, UK

Correspondence:

C. FEGAN - Fegancd1@cardiff.ac.uk

<https://doi.org/10.3324/haematol.2023.283527>

Received: May 19, 2023.

Accepted: January 15, 2024.

Early view: January 25, 2024.

©2024 Ferrata Storti Foundation

Published under a CC BY-NC license 

**Supplementary Table 1 Hazard ratios for prognostic markers of overall survival**

|                                                    | Simple Model - 1 explanatory variable                                            | Basic Multiple regression model | Basic model & LDT               | Basic model & B2M               | Basic model, B2M & Genetic      | Basic model, B2M & Vh Status    |
|----------------------------------------------------|----------------------------------------------------------------------------------|---------------------------------|---------------------------------|---------------------------------|---------------------------------|---------------------------------|
| <b>Welsh Index of Multiple Deprivation (N=662)</b> | <b>Reference = Most Deprived<br/>Hazard Ratio (HR), [95% C.I of HR], P-value</b> |                                 |                                 |                                 |                                 |                                 |
| 2 <sup>nd</sup> Most Deprived                      | 0.85<br>[0.59, 1.25]<br>0.413                                                    | 0.80<br>[0.54, 1.18]<br>0.260   | 1.02<br>[0.63, 1.67]<br>0.924   | 1.07<br>[0.66, 1.75]<br>0.777   | 0.49<br>[0.23, 1.03]<br>0.058   | 0.81<br>[0.38, 1.73]<br>0.586   |
| 2 <sup>nd</sup> Least Deprived                     | 0.80<br>[0.52, 1.22]<br>0.294                                                    | 0.68<br>[0.43, 1.07]<br>0.097   | 0.96<br>[0.57, 1.62]<br>0.875   | 0.67<br>[0.37, 1.20]<br>0.177   | 0.42<br>[0.18, 0.96]<br>0.039   | 0.39<br>[0.15, 1.01]<br>0.052   |
| Least Deprived                                     | 0.59<br>[0.42, 0.82]<br>0.002                                                    | 0.57<br>[0.40, 0.81]<br>0.002   | 0.75<br>[0.48, 1.17]<br>0.203   | 0.71<br>[0.45, 1.12]<br>0.141   | 0.37<br>[0.19, 0.73]<br>0.004   | 0.5<br>[0.25, 1.00]<br>0.05     |
| <b>Age Quartiles (N=662)</b>                       | <b>Reference = &lt;55 Years HR, [95% C.I of HR], P-value</b>                     |                                 |                                 |                                 |                                 |                                 |
| 55-64                                              | 1.42<br>[0.88, 2.31]<br>0.155                                                    | 1.59<br>[0.95, 2.66]<br>0.076   | 1.55<br>[0.80, 3.03]<br>0.197   | 1.34<br>[0.75, 2.41]<br>0.321   | 1.38<br>[0.73, 2.59]<br>0.316   | 1.70<br>[0.76, 3.79]<br>0.193   |
| 65-74                                              | 2.15<br>[1.38, 3.34]<br>0.001                                                    | 2.20<br>[1.37, 3.53]<br>0.001   | 2.83<br>[1.56, 5.14]<br>0.001   | 1.80<br>[1.05, 3.09]<br>0.034   | 1.79<br>[0.95, 3.37]<br>0.073   | 2.15<br>[1.05, 4.39]<br>0.035   |
| ≥75                                                | 6.34<br>[4.11, 9.78]<br><0.001                                                   | 7.99<br>[4.96, 12.87]<br><0.001 | 9.02<br>[5.00, 16.26]<br><0.001 | 8.05<br>[4.60, 14.07]<br><0.001 | 9.90<br>[4.30, 22.78]<br><0.001 | 8.17<br>[3.08, 21.65]<br><0.001 |
| <b>Stage at diagnosis (N=661)</b>                  | <b>Reference = A or A0 HR, [95% C.I of HR], P-value</b>                          |                                 |                                 |                                 |                                 |                                 |
| B                                                  | 1.96<br>[1.28, 3.00]<br>0.002                                                    | 2.79<br>[1.75, 4.44]<br><0.001  | 4.37<br>[2.22, 8.60]<br><0.001  | 2.51<br>[1.48, 4.25]<br>0.001   | 2.00<br>[1.07, 3.75]<br>0.030   | 2.04<br>[0.95, 4.38]<br>0.068   |
| C                                                  | 2.59<br>[1.70, 3.93]<br><0.001                                                   | 4.38<br>[2.79, 6.86]<br><0.001  | 2.64<br>[0.80, 8.70]<br>0.112   | 2.85<br>[1.62, 5.01]<br><0.001  | 3.36<br>[1.71, 6.60]<br><0.001  | 3.75<br>[1.53, 9.23]<br>0.004   |
| <b>CD38 status (N=591)</b>                         | <b>Reference = &lt;20 % HR, [95% C.I of HR], P-value</b>                         |                                 |                                 |                                 |                                 |                                 |
| CD38 ≥20%                                          | 1.90[1.45, 2.49]<0.001                                                           | 1.84[1.39, 2.42]<0.001          | 1.43[1.03, 2.00]0.033           | 2.03[1.43, 2.88]<0.001          | 1.86[1.11, 3.13]0.019           | 2.21[1.25, 3.91]0.006           |
| <b>LDT (N=560)</b>                                 | <b>Reference ≥= 12 HR, [95% C.I of HR], P-value</b>                              |                                 |                                 |                                 |                                 |                                 |
| <12                                                | 2.08<br>[1.43, 3.01]<br><0.001                                                   |                                 | 1.43<br>[0.94, 2.18]<br>0.090   |                                 |                                 |                                 |
| <b>B2M (N=491)</b>                                 | <b>Reference = &lt; 3.5 HR, [95% C.I of HR], P-value</b>                         |                                 |                                 |                                 |                                 |                                 |
| ≥3.5 mg/l                                          | 2.48<br>[1.81, 3.40]<br><0.001                                                   |                                 |                                 | 2.05<br>[1.44, 2.94]<br><0.001  | 1.48<br>[0.90, 2.45]<br>0.126   | 1.55<br>[0.91, 2.64]<br>0.110   |
| <b>Adverse Cytogenetics (N=265)</b>                | <b>Reference NOT (ATM and/or P53 deletions) HR, [95% C.I of HR], P-value</b>     |                                 |                                 |                                 |                                 |                                 |
| ATM and/or P53 deletion                            | 2.51<br>[1.62, 3.89]<br><0.001                                                   |                                 |                                 |                                 | 1.81<br>[1.04, 3.18]<br>0.037   |                                 |

| IGVH Status (N=221) | Reference = <0.98 Hazard Ratio, [95% C.I of HR], P-value) |     |     |     |     |                               |
|---------------------|-----------------------------------------------------------|-----|-----|-----|-----|-------------------------------|
| ≥0.98               | 2.24<br>[1.48, 3.41]<br><0.001                            |     |     |     |     | 2.14<br>[1.19, 3.84]<br>0.011 |
| Observations        |                                                           | 590 | 505 | 439 | 224 | 160                           |

Adverse cytogenetics = deletion of 11q and/or 17p.

Binet stage at diagnosis – Stage A0 No lymphadenopathy, Stage A Lymphadenopathy <3 sites, Stage B – 3 or more lymphoid site enlargements, Stage C – Haemoglobin <10g/dl and/or Platelets <100 x10<sup>9</sup>/l.

B2M – Beta2Microglobulin

LDT – Lymphocyte Doubling Time - <12 - ≥12 months

IGVH - Immunoglobulin Heavy-chain gene Variable region

### Supplementary Table 2 Age at Diagnosis and Death

| WIMD<br>Quartiles                            | Age at Diagnosis      |     |                                |     |                               |    |                                         | Age at Death          |     |                                |     |                               |    |                                          |
|----------------------------------------------|-----------------------|-----|--------------------------------|-----|-------------------------------|----|-----------------------------------------|-----------------------|-----|--------------------------------|-----|-------------------------------|----|------------------------------------------|
|                                              | Overall Cohort        |     | Subgroup: Stage A/A0 diagnosis |     | Subgroup: Stage B/C diagnosis |    | Mann-Whitney U Test (Stages A/A0 & B/C) | Overall Cohort        |     | Subgroup: Stage A/A0 diagnosis |     | Subgroup: Stage B/C diagnosis |    | Mann-Whitney U Test (Stages A/A0 vs B/C) |
|                                              | Median age [p25, p75] | n   | Median age [p25, p75]          | n   | Median age [p25, p75]         | n  |                                         | Median age [p25, p75] | n   | Median age [p25, p75]          | n   | Median age [p25, p75]         | n  |                                          |
| Most Deprived                                | 65<br>[56, 74]        | 123 | 65<br>[57, 73]                 | 102 | 67<br>[52, 77]                | 21 | 0.835                                   | 79<br>[67, 86]        | 58  | 79.5<br>[69, 86]               | 40  | 77.5<br>[61, 81]              | 18 | 0.102                                    |
| 2 <sup>nd</sup> Most Deprived                | 67<br>[57, 74]        | 137 | 68<br>[57, 76]                 | 114 | 59<br>[51, 73]                | 23 | 0.041                                   | 80<br>[67, 86]        | 61  | 80<br>[67, 87]                 | 47  | 70.5<br>[62, 81]              | 14 | 0.073                                    |
| 2 <sup>nd</sup> Least Deprived               | 65<br>[58, 75]        | 95  | 68<br>[58, 76]                 | 83  | 61<br>[57.5, 64]              | 12 | 0.114                                   | 81.5<br>[69, 87]      | 42  | 82<br>[72, 88]                 | 35  | 65<br>[63, 75]                | 7  | 0.003                                    |
| Least Deprived                               | 67<br>[57, 75]        | 307 | 67<br>[58, 75]                 | 278 | 57<br>[52.5, 65]              | 28 | <0.001                                  | 80<br>[74, 87]        | 102 | 81<br>[77, 88]                 | 87  | 72<br>[65, 75]                | 14 | <0.001                                   |
| Overall Cohort                               | 67<br>[57,74]         | 662 | 67<br>[58, 75]                 | 577 | 60<br>[52, 69.5]              | 84 | <0.001                                  | 80<br>[70, 86]        | 263 | 81<br>[74, 87]                 | 209 | 71<br>[62, 79]                | 53 | <0.001                                   |
| Mann-Whitney U Test (Most vs Least Deprived) | 0.420                 |     | 0.153                          |     | 0.074                         |    |                                         | 0.052                 |     | 0.077                          |     | 0.529                         |    |                                          |

WIMD = Welsh Index of Multiple Deprivation

**Supplementary Table 3 Clinical therapeutic studies offered to patients**

| <b>Clinical Trial<br/>n (%)</b>                                    | <b>Most<br/>Deprived</b> | <b>2<sup>nd</sup> Most<br/>Deprived</b> | <b>2<sup>nd</sup> Least<br/>Deprived</b> | <b>Least<br/>Deprived</b> | <b>Total</b> |
|--------------------------------------------------------------------|--------------------------|-----------------------------------------|------------------------------------------|---------------------------|--------------|
| No (not offered/entered a trial)                                   | 28<br>(22.76)            | 31 (22.63)                              | 15 (15.79)                               | 67 (21.82)                | 141 (21.3)   |
| Yes (entered a trial)                                              | 13<br>(10.57)            | 18 (13.14)                              | 12 (12.63)                               | 34 (11.07)                | 77 (11.63)   |
| Eligible but did not enter a trial<br>as declined offer of a trial | 2 (1.63)                 | 3 (2.19)                                | 2 (2.11)                                 | 3 (0.98)                  | 10 (1.51)    |
| Not Applicable                                                     | 80<br>(65.04)            | 85 (62.04)                              | 66 (69.47)                               | 203 (66.12)               | 434 (65.56)  |
| Total                                                              | 123<br>(100)             | 137 (100)                               | 95 (100)                                 | 307 (100)                 | 662 (100)    |

Chi2(9) = 3.9117, P-value = 0.917
